# Supplementary material
Source: ML conference proceedings conference paper supplement (https://proceedings.neurips.cc/paper_files/paper/2023/hash/a766f56d2da42cae20b5652970ec04ef-Abstract.html)
Supplement: Supplementary file [file a766f56d2da42cae20b5652970ec04ef-Supplemental-Conference.pdf]

557  
558

## Supplementary Material of “Designing Robust Transformers using Robust Kernel Density Estimation”

### 559 A The Non-parametric Regression Perspective of Self-Attention

560 Given an input sequence  $\mathbf{X} = [\mathbf{x}_1, \dots, \mathbf{x}_N]^\top \in \mathbb{R}^{N \times D_x}$  of  $N$  feature vectors, the self-attention  
561 mechanism transforms it into another sequence  $\mathbf{H} := [\mathbf{h}_1, \dots, \mathbf{h}_N]^\top \in \mathbb{R}^{N \times D_v}$  as follows:

$$\mathbf{h}_i = \sum_{j \in [N]} \text{softmax}\left(\frac{\mathbf{q}_i^\top \mathbf{k}_j}{\sqrt{D}}\right) \mathbf{v}_j, \text{ for } i = 1, \dots, N. \quad (13)$$

562 The vectors  $\mathbf{q}_i$ ,  $\mathbf{k}_j$  and  $\mathbf{v}_j$  are the query, key and value vectors, respectively. They are computed as  
563 follows:

$$\begin{aligned} [\mathbf{q}_1, \mathbf{q}_2, \dots, \mathbf{q}_N]^\top &:= \mathbf{Q} = \mathbf{X} \mathbf{W}_Q^\top \in \mathbb{R}^{N \times D}, \\ [\mathbf{k}_1, \mathbf{k}_2, \dots, \mathbf{k}_N]^\top &:= \mathbf{K} = \mathbf{X} \mathbf{W}_K^\top \in \mathbb{R}^{N \times D}, \\ [\mathbf{v}_1, \mathbf{v}_2, \dots, \mathbf{v}_N]^\top &:= \mathbf{V} = \mathbf{X} \mathbf{W}_V^\top \in \mathbb{R}^{N \times D_v}, \end{aligned} \quad (14)$$

564 where  $\mathbf{W}_Q, \mathbf{W}_K \in \mathbb{R}^{D \times D_x}$ ,  $\mathbf{W}_V \in \mathbb{R}^{D_v \times D_x}$  are the weight matrices. Equation (13) can be written  
565 in the following equivalent matrix form:

$$\mathbf{H} = \text{softmax}\left(\frac{\mathbf{Q} \mathbf{K}^\top}{\sqrt{D}}\right) \mathbf{V}, \quad (15)$$

566 where the softmax function is applied to each row of the matrix  $(\mathbf{Q} \mathbf{K}^\top) / \sqrt{D}$ . Equation (15) is  
567 also called the “softmax attention”. Assume we have the key and value vectors  $\{\mathbf{k}_j, \mathbf{v}_j\}_{j \in [N]}$  that  
568 is collected from the data generating process

$$\mathbf{v} = f(\mathbf{k}) + \varepsilon, \quad (16)$$

569 where  $\varepsilon$  is some noise vectors with  $\mathbb{E}[\varepsilon] = 0$ , and  $f$  is the function that we want to estimate. If  
570  $\{\mathbf{k}_j\}_{j \in [N]}$  are i.i.d. samples from the distribution  $p(\mathbf{k})$ , and  $p(\mathbf{v}, \mathbf{k})$  is the joint distribution of  $(\mathbf{v}, \mathbf{k})$   
571 defined by equation (16), we have

$$f(\mathbf{k}) = \mathbb{E}[\mathbf{v} | \mathbf{k}] = \int_{\mathbb{R}^D} \mathbf{v} \cdot p(\mathbf{v} | \mathbf{k}) d\mathbf{v} = \int_{\mathbb{R}^D} \frac{\mathbf{v} \cdot p(\mathbf{v}, \mathbf{k})}{p(\mathbf{k})} d\mathbf{v}, \quad (17)$$

572 We need to obtain estimations for both the joint density function  $p(\mathbf{v}, \mathbf{k})$  and the marginal density  
573 function  $p(\mathbf{k})$  to obtain function  $f$ , one popular approach is the kernel density estimation:

$$\hat{p}_\sigma(\mathbf{v}, \mathbf{k}) = \frac{1}{N} \sum_{j \in [N]} k_\sigma([\mathbf{v}, \mathbf{k}] - [\mathbf{v}_j, \mathbf{k}_j]) \quad (18)$$

$$\hat{p}_\sigma(\mathbf{k}) = \frac{1}{N} \sum_{j \in [N]} k_\sigma(\mathbf{k} - \mathbf{k}_j), \quad (19)$$

574 where  $[\mathbf{v}, \mathbf{k}]$  denotes the concatenation of  $\mathbf{v}$  and  $\mathbf{k}$ .  $k_\sigma$  could be isotropic Gaussian kernel:  $k_\sigma(\mathbf{x} -$   
575  $\mathbf{x}') = \exp(-\|\mathbf{x} - \mathbf{x}'\|^2 / (2\sigma^2))$ , we have

$$\hat{p}_\sigma(\mathbf{v}, \mathbf{k}) = \frac{1}{N} \sum_{j \in [N]} k_\sigma(\mathbf{v} - \mathbf{v}_j) k_\sigma(\mathbf{k} - \mathbf{k}_j). \quad (20)$$

576 Combining equations (19), (20), and (17), we obtain the NW estimator of the function  $f$  as

$$\hat{f}_\sigma(\mathbf{k}) = \int_{\mathbb{R}^D} \frac{\mathbf{v} \cdot \hat{p}_\sigma(\mathbf{v}, \mathbf{k})}{\hat{p}_\sigma(\mathbf{k})} d\mathbf{v} \quad (21)$$

$$\begin{aligned} &= \int_{\mathbb{R}^D} \frac{\mathbf{v} \cdot \sum_{j \in [N]} k_\sigma(\mathbf{v} - \mathbf{v}_j) k_\sigma(\mathbf{k} - \mathbf{k}_j)}{\sum_{j \in [N]} k_\sigma(\mathbf{k} - \mathbf{k}_j)} d\mathbf{v} \\ &= \frac{\sum_{j \in [N]} k_\sigma(\mathbf{k} - \mathbf{k}_j) \int \mathbf{v} \cdot k_\sigma(\mathbf{v} - \mathbf{v}_j) d\mathbf{v}}{\sum_{j \in [N]} k_\sigma(\mathbf{k} - \mathbf{k}_j)} \\ &= \frac{\sum_{j \in [N]} \mathbf{v}_j k_\sigma(\mathbf{k} - \mathbf{k}_j)}{\sum_{j \in [N]} k_\sigma(\mathbf{k} - \mathbf{k}_j)}. \end{aligned} \quad (22)$$

577 Now we show how the self-attention mechanism is related to the NW estimator. If the keys  
 578  $\{\mathbf{k}_j\}_{j \in [N]}$  are normalized

$$\begin{aligned}
 \hat{f}_\sigma(\mathbf{q}) &= \frac{\sum_{j \in [N]} \mathbf{v}_j \exp(-\|\mathbf{q} - \mathbf{k}_j\|^2/2\sigma^2)}{\sum_{j \in [N]} \exp(-\|\mathbf{q} - \mathbf{k}_j\|^2/2\sigma^2)} \\
 &= \frac{\sum_{j \in [N]} \mathbf{v}_j \exp[-(\|\mathbf{q}\|^2 + \|\mathbf{k}_j\|^2)/2\sigma^2] \exp(\mathbf{q}^\top \mathbf{k}_j/\sigma^2)}{\sum_{j \in [N]} \exp[-(\|\mathbf{q}\|^2 + \|\mathbf{k}_j\|^2)/2\sigma^2] \exp(\mathbf{q}^\top \mathbf{k}_j/\sigma^2)} \\
 &= \sum_{j \in [N]} \frac{\exp(\mathbf{q}^\top \mathbf{k}_j/\sigma^2)}{\sum_{j \in [N]} \exp(\mathbf{q}^\top \mathbf{k}_j/\sigma^2)} \mathbf{v}_j \\
 &= \sum_{j \in [N]} \text{softmax}(\mathbf{q}^\top \mathbf{k}_j/\sigma^2) \mathbf{v}_j.
 \end{aligned} \tag{23}$$

579 Then estimating the softmax attention is equivalent to estimating  $\hat{f}_\sigma(\mathbf{q})$ .

## 580 B Details on Leveraging Robust KDE on Transformers

581 For simplicity, we use the Huber loss function as the demonstrating example, which is defined as  
 582 follows:

$$\rho(x) := \begin{cases} x^2/2, & 0 \leq x \leq a \\ ax - a^2/2, & a < x, \end{cases} \tag{24}$$

583 where  $a$  is a constant. The solution to this robust regression problem has the following form:

584 **Proposition 1.** *Assume the robust loss function  $\rho$  is non-decreasing in  $[0, \infty]$ ,  $\rho(0) = 0$  and  
 585  $\lim_{x \rightarrow 0} \frac{\rho(x)}{x} = 0$ . Define  $\psi(x) := \frac{\rho'(x)}{x}$  and assume  $\psi(0) = \lim_{x \rightarrow 0} \frac{\rho'(x)}{x}$  exists and finite. Then  
 586 the optimal  $\hat{p}_{\text{robust}}$  can be written as*

$$\hat{p}_{\text{robust}} = \sum_{j \in [N]} \omega_j k_\sigma(\mathbf{x}_j, \cdot),$$

587 where  $\omega = (\omega_1, \dots, \omega_N) \in \Delta_N$ , with each  $\omega_j \propto \psi(\|k_\sigma(\mathbf{x}_j, \cdot) - \hat{p}_{\text{robust}}\|_{\mathcal{H}_{k_\sigma}})$ . Here  $\Delta_n$  denotes  
 588 the  $n$ -dimensional probability simplex.

589 *Proof.* The proof of Proposition 1 is mainly adapted from the proof in Kim & Scott (2012). Here,  
 590 we provide proof of completeness. For any  $p \in \mathcal{H}_{k_\sigma}$ , we denote

$$J(p) = \frac{1}{N} \sum_{j \in [N]} \rho(\|k_\sigma(\mathbf{x}_j, \cdot) - p\|_{\mathcal{H}_{k_\sigma}}).$$

591 Then we have the following lemma regarding the Gateaux differential of  $J$  and a necessary condition  
 592 for  $\hat{p}_{\text{robust}}$  to be optimal solution of the robust loss objective function in equation (5).

593 **Lemma 1.** *Given the assumptions on the robust loss function  $\rho$  in Proposition 1, the Gateaux dif-  
 594 ferential of  $J$  at  $p \in \mathcal{H}_{k_\sigma}$  with incremental  $h \in \mathcal{H}_{k_\sigma}$ , defined as  $\delta J(p; h)$ , is*

$$\delta J(p; h) := \lim_{\tau \rightarrow 0} \frac{J(p + \tau h) - J(p)}{\tau} = -\langle V(p), h \rangle_{\mathcal{H}_{k_\sigma}},$$

where the function  $V : \mathcal{H}_{k_\sigma} \rightarrow \mathcal{H}_{k_\sigma}$  is defined as:

$$V(p) = \frac{1}{N} \sum_{j \in [N]} \psi(\|k_\sigma(\mathbf{x}_j, \cdot) - p\|_{\mathcal{H}_{k_\sigma}}) (k_\sigma(\mathbf{x}_j, \cdot) - p).$$

595 A necessary condition for  $\hat{p}_{\text{robust}}$  is  $V(\hat{p}_{\text{robust}}) = 0$ .

596 The proof of Lemma 1 can be found in Lemma 1 of Kim & Scott (2012). Based on the necessary  
 597 condition for  $\hat{p}_{\text{robust}}$  in Lemma 1, i.e.,  $V(\hat{p}_{\text{robust}}) = 0$ , we have

$$\frac{1}{N} \sum_{j \in [N]} \psi \left( \|k_{\sigma}(\mathbf{x}_j, \cdot) - \hat{p}_{\text{robust}}\|_{\mathcal{H}_{k_{\sigma}}} \right) (k_{\sigma}(\mathbf{x}_j, \cdot) - \hat{p}_{\text{robust}}) = 0.$$

598 Direct algebra indicates that  $\hat{p}_{\text{robust}} = \sum_{j \in [N]} \omega_j k_{\sigma}(\mathbf{x}_j, \cdot)$  where  $\omega = (\omega_1, \dots, \omega_N) \in \Delta_N$ , and  
 599  $\omega_j \propto \psi \left( \|k_{\sigma}(\mathbf{x}_j, \cdot) - \hat{p}_{\text{robust}}\|_{\mathcal{H}_{k_{\sigma}}} \right)$ . As a consequence, we obtain the conclusion of the proposition.  
 600  $\square$

601 For the Huber loss function, we have that

$$\psi(x) := \begin{cases} 1, & 0 \leq x \leq a \\ a/x, & a < x. \end{cases}$$

602 Hence, when the error  $\|k_{\sigma}(\mathbf{x}_j, \cdot) - \hat{p}_{\text{robust}}\|_{\mathcal{H}_{k_{\sigma}}}$  is over the threshold  $a$ , the final estimator will  
 603 down-weight the importance of  $k_{\sigma}(\mathbf{x}_j, \cdot)$ . This is in sharp contrast with the standard KDE method,  
 604 which will assign uniform weights to all of the  $k_{\sigma}(\mathbf{x}_j, \cdot)$ . As we mentioned in the main paper, the  
 605 estimator provided in Proposition 1 is circularly defined, as  $\hat{p}_{\text{robust}}$  is defined via  $\omega$ , and  $\omega$  depends on  
 606  $\hat{p}_{\text{robust}}$ . Such an issue can be addressed by estimating  $\omega$  with an iterative algorithm termed as kernel-  
 607 ized iteratively re-weighted least-squares (KIRWLS). The algorithm starts with randomly initialized  
 608  $\omega^{(0)} \in \Delta_n$ , and perform the following iterative updates between two steps:

$$\hat{p}_{\text{robust}}^{(k)} = \sum_{j \in [N]} \omega_j^{(k-1)} k_{\sigma}(\mathbf{x}_j, \cdot), \quad \omega_j^{(k)} = \frac{\psi \left( \|k_{\sigma}(\mathbf{x}_j, \cdot) - \hat{p}_{\text{robust}}^{(k)}\|_{\mathcal{H}_{k_{\sigma}}} \right)}{\sum_{j \in [N]} \psi \left( \|k_{\sigma}(\mathbf{x}_j, \cdot) - \hat{p}_{\text{robust}}^{(k)}\|_{\mathcal{H}_{k_{\sigma}}} \right)}. \quad (25)$$

609 Note that, the optimal  $\hat{p}_{\text{robust}}$  is the fixed point of this iterative update, and the KIRWLS algorithm  
 610 converges under standard regularity conditions. Furthermore, one can directly compute the term  
 611  $\|k_{\sigma}(\mathbf{x}_j, \cdot) - \hat{p}_{\text{robust}}^{(k)}\|_{\mathcal{H}_{k_{\sigma}}}$  via the reproducing property:

$$\begin{aligned} \left\| k_{\sigma}(\mathbf{x}_j, \cdot) - \hat{p}_{\text{robust}}^{(k)} \right\|_{\mathcal{H}_{k_{\sigma}}}^2 &= -2 \sum_{m \in [N]} \omega_m^{(k-1)} k_{\sigma}(\mathbf{x}_m, \mathbf{x}_j) + k_{\sigma}(\mathbf{x}_j, \mathbf{x}_j) \\ &\quad + \sum_{m \in [N], n \in [N]} \omega_m^{(k-1)} \omega_n^{(k-1)} k_{\sigma}(\mathbf{x}_m, \mathbf{x}_n). \end{aligned} \quad (26)$$

612 Therefore, the weights can be updated without mapping the data to the Hilbert space.

## 613 C Fourier Attention with Median of Means

614 We introduce the Fourier Attention coupled with the Median of Means (MoM) principle and show  
 615 how this is robust to outliers. For any given function  $\phi : \mathbb{R} \rightarrow \mathbb{R}$  and radius  $R$ , we randomly divide  
 616 the keys  $\{\mathbf{k}_i\}_{i \in [N]}$  into  $B$  subsets  $I_1, \dots, I_B$  of equal size where  $|I_1| = |I_2| = \dots = |I_B| = \mathcal{S}$ .  
 617 Define  $\hat{p}_{R, I_m}(\mathbf{q}_l) = \frac{1}{\mathcal{S}} \sum_{i \in I_m} \prod_{j=1}^D \phi \left( \frac{\sin(R(q_{lj} - k_{ij}))}{R(q_{lj} - k_{ij})} \right)$ , then the MoM Fourier attention is defined as  
 618 as

$$\hat{\mathbf{h}}_l = \frac{\frac{1}{\mathcal{S}} \sum_{i \in I_m} \mathbf{v}_i \prod_{j=1}^D \phi \left( \frac{\sin(R(q_{lj} - k_{ij}))}{R(q_{lj} - k_{ij})} \right)}{\text{median}\{\hat{p}_{R, I_1}(\mathbf{q}_l), \dots, \hat{p}_{R, I_B}(\mathbf{q}_l)\}}, \quad (27)$$

619 where  $I_m$  is the block such that  $\hat{p}_R(\mathbf{q}_l, \mathbf{k})$  achieves its median value. To shed light into the robustness  
 620 of Transformers that use Eq. (27) as the attention mechanism, we demonstrate that the estimator  
 621  $\hat{p}_R(\mathbf{q}) = \text{median}\{\hat{p}_{R, I_1}(\mathbf{q}), \dots, \hat{p}_{R, I_B}(\mathbf{q})\}$  is a robust estimator of the density function  $p(\mathbf{q})$  of the  
 622 keys. We first introduce a few notations that are useful for stating this result. Denote  $\mathcal{C} = \{1 \leq$   
 623  $i \leq N : k_i \text{ is clean}\}$  and  $\mathcal{O} = \{1 \leq i \leq N : k_i \text{ is outlier}\}$ . Then, we have  $\mathcal{C} \cap \mathcal{O} = \emptyset$  and  
 624  $\mathcal{C} \cup \mathcal{O} = \{1, 2, \dots, N\}$ . The following result establishes a high probability upper bound on the  
 625 sup-norm between  $\hat{p}_R(\mathbf{q})$  and  $p(\mathbf{q})$ .

626 **Theorem 1.** Assume that the function  $\phi$  satisfies  $\int \phi(\sin(z)/z)z^j dz = 0$  for all  $1 \leq j \leq m$   
627 and  $\int |\phi(\sin(z)/z)||z|^{m+1} dz < \infty$  for some  $m \in \mathbb{N}$ . Furthermore, the density function  $p(\mathbf{q})$   
628 satisfies  $\sup_{\mathbf{q}} |p(\mathbf{q})| < \infty$ . The number of blocks  $B$  and the number of outliers  $|\mathcal{O}|$  are such that  
629  $B > (2 + \delta)|\mathcal{O}|$  where  $\delta$  is the failure probability. Then, with  $\Delta = \frac{1}{2+\delta} - \frac{|\mathcal{O}|}{B}$  for the radius  $R$   
630 sufficiently large and  $\delta$  sufficiently small, with probability at least  $1 - \exp(-2\Delta^2 B)$  we find that

$$\|\hat{p}_R - p\|_\infty \leq C\left(\frac{1}{R^{m+1}} + \sqrt{\frac{BR^D \log R \log(2/\delta)}{N}}\right)$$

631 where  $C$  is some universal constant.

632 *Remark 1.* The result of Theorem 1 indicates by choosing  $R = \mathcal{O}(N^{-\frac{1}{2(m+1)+D}})$ , the rate of  $\hat{p}_R$  to  $p$   
633 under the supremum norm is  $\mathcal{O}(N^{-\frac{m+1}{2(m+1)+D}})$ . With that choice of  $R$ , when  $N$  approaches infinity,  
634 the MoM estimator  $\hat{p}_R$  is a consistent estimator of the clean distribution  $p$  of the keys. This confirms  
635 the validity of using  $\hat{p}_R$  to robustify  $p$  and similarly the usage of MoM Fourier attention Eq. (27) as  
636 a robust attention for Transformers.

637 *Proof.* From the formulation of the MoM estimator  $\hat{p}_R(\mathbf{q})$ , we obtain the following inequality

$$\left\{ \sup_{\mathbf{q}} |\hat{p}_R(\mathbf{q}) - p(\mathbf{q})| \geq \epsilon \right\} \subset \left\{ \sup_{\mathbf{q}} \sum_{b=1}^B \mathbf{1}_{\{|\hat{p}_{R,I_b}(\mathbf{q}) - p(\mathbf{q})| \geq \epsilon\}} \geq \frac{B}{2} \right\}$$

638 This bound indicates that to bound  $\mathbb{P}(\|\hat{p}_R(\mathbf{q}) - p(\mathbf{q})\|_\infty \geq \epsilon)$ , it is sufficient to bound  
639  $\mathbb{P}(\{\sup_{\mathbf{q}} \sum_{b=1}^B \mathbf{1}_{\{|\hat{p}_{R,I_b}(\mathbf{q}) - p(\mathbf{q})| \geq \epsilon\}} \geq \frac{B}{2}\})$ . Indeed, for each  $1 \leq b \leq B$ , we find that

$$\mathbf{1}_{\{|\hat{p}_{R,I_b}(\mathbf{q}) - p(\mathbf{q})| \geq \epsilon\}} \leq \mathbf{1}_{\{\sup_{\mathbf{q}} \{|\hat{p}_{R,I_b}(\mathbf{q}) - p(\mathbf{q})| \geq \epsilon\}}.$$

640 Therefore, we have

$$\sum_{b=1}^B \mathbf{1}_{\{|\hat{p}_{R,I_b}(\mathbf{q}) - p(\mathbf{q})| \geq \epsilon\}} \leq \sum_{b=1}^B \mathbf{1}_{\{\sup_{\mathbf{q}} \{|\hat{p}_{R,I_b}(\mathbf{q}) - p(\mathbf{q})| \geq \epsilon\}}},$$

641 which leads to  $\sup_{\mathbf{q}} \sum_{b=1}^B \mathbf{1}_{\{|\hat{p}_{R,I_b}(\mathbf{q}) - p(\mathbf{q})| \geq \epsilon\}} \leq \sum_{b=1}^B \mathbf{1}_{\{\sup_{\mathbf{q}} \{|\hat{p}_{R,I_b}(\mathbf{q}) - p(\mathbf{q})| \geq \epsilon\}}$ . This inequality  
642 shows that

$$\mathbb{P}\left(\left\{ \sup_{\mathbf{q}} \sum_{b=1}^B \mathbf{1}_{\{|\hat{p}_{R,I_b}(\mathbf{q}) - p(\mathbf{q})| \geq \epsilon\}} \geq \frac{B}{2} \right\}\right) \leq \mathbb{P}\left(\sum_{b=1}^B \mathbf{1}_{\{\sup_{\mathbf{q}} \{|\hat{p}_{R,I_b}(\mathbf{q}) - p(\mathbf{q})| \geq \epsilon\}}\right).$$

643 To ease the presentation, we denote  $W_b = \mathbf{1}_{\{\sup_{\mathbf{q}} \{|\hat{p}_{R,I_b}(\mathbf{q}) - p(\mathbf{q})| \geq \epsilon\}}$  and  $\mathcal{B} = \{1 \leq b \leq B : I_b \cap \mathcal{O} = \emptyset\}$ . Then, the following inequalities hold

$$\begin{aligned} \sum_{b=1}^B \mathbf{1}_{\{\sup_{\mathbf{q}} \{|\hat{p}_{R,I_b}(\mathbf{q}) - p(\mathbf{q})| \geq \epsilon\}} &= \sum_{b \in \mathcal{B}} W_b + \sum_{b \in \mathcal{B}^c} W_b \\ &\leq \sum_{b \in \mathcal{B}} W_b + |\mathcal{O}| \\ &\leq \sum_{b \in \mathcal{B}} (W_b - \mathbb{E}[W_b]) + B \cdot \mathbb{P}(\sup_{\mathbf{q}} |\hat{p}_{R,I_1}(\mathbf{q}) - p(\mathbf{q})| > \epsilon) + |\mathcal{O}|, \end{aligned}$$

645 where we assume without loss of generality that  $1 \in \mathcal{B}$ , which is possible due to the assumption that  
646  $B > (2 + \delta)|\mathcal{O}|$ . By adapting Lemma 1 in Nguyen et al. (2022c) to uniform concentration bound,  
647 we have

$$\mathbb{P}\left(\sup_{\mathbf{q}} |\hat{p}_{R,I_1}(\mathbf{q}) - p(\mathbf{q})| \geq C\left(\frac{1}{R^{m+1}} + \sqrt{\frac{R^D \log R \log(2/\delta)}{|I_1|}}\right)\right) \leq \delta.$$

648 By choose  $\epsilon = C\left(\frac{1}{R^{m+1}} + \sqrt{\frac{R^D \log R \log(2/\delta)}{|I_1|}}\right)$ , then we find that

$$\mathbb{P}\left(\sup_{\mathbf{q}} |\hat{p}_{R,I_1}(\mathbf{q}) - p(\mathbf{q})| > \epsilon\right) \leq \frac{\delta}{2(2 + \delta)}$$

649 Collecting the above inequalities leads to

$$\mathbb{P}(\{\sup_{\mathbf{q}} \sum_{b=1}^B \mathbf{1}_{\{|\hat{p}_{R, I_b}(\mathbf{q}) - p(\mathbf{q})| \geq \epsilon\}} \geq \frac{B}{2}\}) \leq \exp(-2B\Delta^2),$$

650 where  $\Delta = \frac{1}{2+\delta} - \frac{|\mathcal{O}|}{B}$ . As a consequence, we obtain the conclusion of the theorem.  $\square$

## 651 D Dataset Information

652 **WikiText-103** The dataset<sup>1</sup> contains around 268K words and its training set consists of about 28K  
653 articles with 103M tokens, this corresponds to text blocks of about 3600 words. The validation set  
654 and test sets consist of 60 articles with 218K and 246K tokens respectively.

655 **ImageNet** We use the full ImageNet dataset that contains 1.28M training images and 50K vali-  
656 dation images. The model learns to predict the class of the input image among 1000 categories. We  
657 report the top-1 and top-5 accuracy on all experiments. The following ImageNet variants are test  
658 sets that are used to evaluate model performance.

659 **ImageNet-C** For robustness on common image corruptions, we use ImageNet-C (Hendrycks &  
660 Dietterich, 2019) which consists of 15 types of algorithmically generated corruptions with five levels  
661 of severity. ImageNet-C uses the mean corruption error (mCE) as a metric: the smaller mCE means  
662 the more robust the model under corruption.

663 **ImageNet-A** This dataset contains real-world adversarially filtered images that fool current Ima-  
664 geNet classifiers. A 200-class subset of the original ImageNet-1K’s 1000 classes is selected so that  
665 errors among these 200 classes would be considered egregious, which cover most broad categories  
666 spanned by ImageNet-1K.

667 **ImageNet-O** This dataset contains adversarially filtered examples for ImageNet out-of-  
668 distribution detectors. The dataset contains samples from ImageNet-22K but not from ImageNet-  
669 1K, where samples that are wrongly classified as an ImageNet-1K class with high confidence by a  
670 ResNet-50 are selected. We use AUPR (area under precision-recall) as the evaluation metric.

671 **ImageNet-R** This dataset contains various artistic renditions of object classes from the original  
672 ImageNet dataset, which is discouraged by the original ImageNet. ImageNet-R contains 30,000  
673 image renditions for 200 ImageNet classes, where a subset of the ImageNet-1K classes is chosen.

674 **ImageNet-Sketch** This dataset contains 50,000 images, 50 images for each of the 1000 ImageNet  
675 classes. The dataset is constructed with Google Image queries “sketch of xxx”, where xxx is the  
676 standard class name. The search is only performed within the “black and white” color scheme.

## 677 E Ablation Studies

678 In this section, we provide additional results and ablation studies that focus on different design  
679 choices for the proposed robust KDE attention mechanisms. The detailed experimental settings can  
680 be found in the caption of each table.

---

<sup>1</sup>[www.salesforce.com/products/einstein/ai-research/the-wikitext-dependency-language-modeling-dataset/](http://www.salesforce.com/products/einstein/ai-research/the-wikitext-dependency-language-modeling-dataset/)

Table 5: Perplexity (PPL) and negative likelihood loss (NLL) of our methods (lower part) and baselines (upper part) on WikiText-103 using a **medium version** of Transformer. The best results are highlighted in bold font and the second best are highlighted in underline. On clean data, Transformer-SPKDE achieves better PPL and NLL than other baselines. Under random swap with outlier words, Transformers with MoM self-attention show much better performance.

| Method (median version)                | Clean Data        |                   | Word Swap         |                   |
|----------------------------------------|-------------------|-------------------|-------------------|-------------------|
|                                        | Valid PPL/Loss    | Test PPL/Loss     | Valid PPL/Loss    | Test PPL/Loss     |
| Transformer (Vaswani et al., 2017b)    | 27.90/3.32        | 29.60/3.37        | 65.36/4.31        | 68.12/4.36        |
| Performer (Choromanski et al., 2021)   | 27.34/3.31        | 29.51/3.36        | 64.72/4.30        | 67.43/4.34        |
| Transformer-MGK (Nguyen et al., 2022b) | 27.28/3.31        | 29.24/3.36        | 64.46/4.30        | 67.31/4.33        |
| FourierFormer (Nguyen et al., 2022c)   | 26.51/3.29        | 28.01/3.33        | 63.74/4.28        | 65.27/4.31        |
| Transformer-RKDE (Huber)               | 26.12/3.28        | 27.89/3.32        | 49.37/3.85        | 51.22/3.89        |
| Transformer-RKDE (Hampel)              | 25.87/3.27        | 27.44/3.31        | 48.62/3.83        | 51.03/3.88        |
| Transformer-SPKDE                      | <b>25.76/3.27</b> | <b>27.35/3.31</b> | 46.91/3.79        | 49.14/3.84        |
| Transformer-MoM                        | 28.26/3.34        | 29.98/3.38        | 45.35/3.75        | 47.92/3.81        |
| FourierFormer-MoM                      | 27.13/3.31        | 29.02/3.36        | <b>43.23/3.71</b> | <b>44.97/3.74</b> |

Table 6: Test PPL/NLL loss versus the parameter  $a$  of Huber loss function defined in Eq. (24) (upper) and Hampel loss function (Kim & Scott, 2012) (lower; we use  $2 \times a$  and  $3 \times a$  as parameters  $b$  and  $c$ ) on original and word-swapped Wiki-103 dataset. The best results are highlighted in bold font and the second best are highlighted in underline. We choose  $a = 0.4$  in rest of the experiments.

| Robust Loss Parameter | 0.1               | 0.2               | 0.4               | 0.6               | 0.8        | 1          |
|-----------------------|-------------------|-------------------|-------------------|-------------------|------------|------------|
| Clean Data            | 32.92/3.48        | 32.87/3.48        | <b>32.29/3.47</b> | <u>32.38/3.48</u> | 32.46/3.48 | 32.48/3.48 |
| Word Swap             | <u>55.82/3.99</u> | 55.97/3.99        | <b>55.68/3.99</b> | 56.89/4.01        | 57.26/4.01 | 57.37/4.01 |
| Clean Data            | 32.67/3.48        | <b>32.32/3.48</b> | <u>32.35/3.48</u> | 32.47/3.48        | 32.53/3.48 | 32.58/3.48 |
| Word Swap             | 58.02/4.03        | <b>57.86/4.03</b> | <u>57.92/4.03</u> | 58.24/4.04        | 58.37/4.04 | 58.43/4.04 |

Table 7: Top-1 classification accuracy on ImageNet versus the parameter  $a$  of Huber loss function defined in Eq. (24) under different settings. The best results are highlighted in bold font and the second best are highlighted in underline. We choose  $a = 0.2$  in rest of the experiments.

| Huber Loss Parameter | 0.1          | 0.2          | 0.4          | 0.6   | 0.8   | 1     |
|----------------------|--------------|--------------|--------------|-------|-------|-------|
| Clean Data           | 71.45        | <b>72.83</b> | <u>71.62</u> | 71.07 | 70.65 | 70.34 |
| FGSM                 | <b>56.72</b> | <u>55.83</u> | 55.34        | 54.87 | 54.02 | 52.98 |
| PGD                  | <b>46.37</b> | <u>44.15</u> | 43.87        | 43.25 | 42.69 | 41.96 |
| SPSA                 | <u>52.38</u> | <b>52.42</b> | 51.69        | 51.34 | 50.97 | 48.22 |
| Imagenet-C           | 45.37        | <u>45.58</u> | <b>45.63</b> | 45.26 | 44.63 | 43.76 |

Table 8: Top-1 classification accuracy on ImageNet versus the parameter  $a$  of Hampel loss function defined in Kim & Scott (2012) under different settings. We use  $2 \times a$  and  $3 \times a$  as parameters  $b$  and  $c$ . The best results are highlighted in bold font and the second best are highlighted in underline. We choose  $a = 0.2$  in rest of the experiments.

| Hampel Loss Parameter | 0.1          | 0.2          | 0.4          | 0.6          | 0.8   | 1     |
|-----------------------|--------------|--------------|--------------|--------------|-------|-------|
| Clean Data            | 71.63        | <b>72.94</b> | <u>71.84</u> | 71.23        | 70.87 | 70.41 |
| FGSM                  | <b>56.42</b> | <u>55.92</u> | 55.83        | 55.66        | 54.97 | 53.68 |
| PGD                   | <b>45.18</b> | <u>44.23</u> | 43.89        | 43.62        | 43.01 | 42.34 |
| SPSA                  | <b>52.96</b> | <u>52.48</u> | 52.13        | 51.46        | 50.92 | 50.23 |
| Imagenet-C            | 44.76        | 45.61        | <u>46.04</u> | <b>46.13</b> | 45.82 | 45.31 |

Table 9: Top-1 classification accuracy on ImageNet versus the parameter  $\beta$  of SPKDE defined in Eq. (6) under different settings.  $\beta = \frac{1}{1-\varepsilon} > 1$ , where  $\varepsilon$  is the percentage of anomalous samples. A larger  $\beta$  indicates a more robust model. The best results are highlighted in bold font and the second best are highlighted in underline. We choose  $\beta = 1.4$  in rest of the experiments.

| $\beta$    | 1.05         | 1.2          | 1.4          | 1.6          | 1.8   | 2     |
|------------|--------------|--------------|--------------|--------------|-------|-------|
| Clean Data | <b>74.25</b> | <u>73.56</u> | 73.22        | 73.01        | 72.86 | 72.64 |
| FGSM       | 53.69        | 55.08        | <b>56.03</b> | <u>55.37</u> | 54.21 | 53.86 |
| PGD        | 42.31        | 43.68        | <b>44.51</b> | <u>44.32</u> | 44.17 | 43.71 |
| SPSA       | 51.29        | 52.02        | <u>52.64</u> | <b>52.84</b> | 52.16 | 51.39 |
| Imagenet-C | 44.68        | <b>45.49</b> | <u>44.76</u> | 44.21        | 43.96 | 43.33 |

Table 10: Top-1 classification accuracy on ImageNet versus the number of iterations of the KIRWLS algorithm in Eq. (25) employed in Transformer-RKDE. Since the increased number of iterations does not lead to significant improvements of performance while the computational cost is much higher, we use the single-step iteration of the KIRWLS algorithm in Transformer-RKDE.

| Iteration # | Huber Loss |       |       |       | Hampel Loss |       |       |       |
|-------------|------------|-------|-------|-------|-------------|-------|-------|-------|
|             | 1          | 2     | 3     | 5     | 1           | 2     | 3     | 5     |
| Clean Data  | 72.83      | 72.91 | 72.95 | 72.98 | 72.94       | 72.99 | 73.01 | 73.02 |
| FGSM        | 55.83      | 55.89 | 55.92 | 55.94 | 55.92       | 55.96 | 55.97 | 55.99 |
| PGD         | 44.15      | 44.17 | 44.17 | 44.18 | 44.23       | 44.26 | 44.28 | 44.31 |
| SPSA        | 52.42      | 52.44 | 52.45 | 52.45 | 52.48       | 52.53 | 52.55 | 52.56 |
| Imagenet-C  | 45.58      | 45.61 | 45.62 | 45.62 | 45.61       | 45.66 | 45.68 | 45.71 |

Table 11: Computation time (measured by seconds per iteration) of baseline methods, Transformer-SPKDE, Transformer-MoM and Transformer-RKDE with different number of KIRWLS iterations. Transformer-SPKDE requires longer time since it directly obtains the optimal set of weights via the QP solver.

|             | Iterations of KIRWLS |      |      |      | DeiT | RVT  | SPKDE | MoM-KDE |
|-------------|----------------------|------|------|------|------|------|-------|---------|
|             | 1                    | 2    | 3    | 5    |      |      |       |         |
| Time (s/it) | 0.43                 | 0.51 | 0.68 | 0.84 | 0.35 | 0.41 | 1.45  | 0.37    |

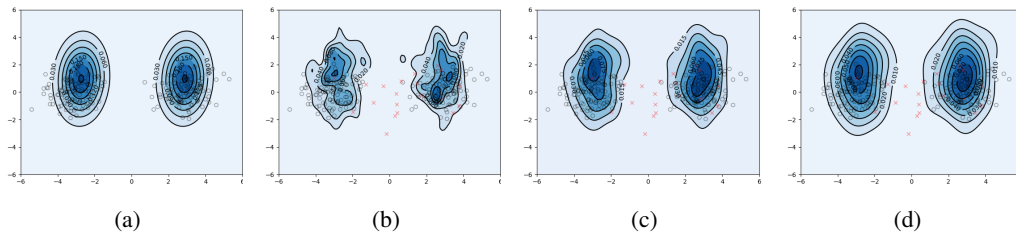

Figure 5: Contour plots of density estimation of the 2-dimensional query vector embedding in an attention layer of the transformer when using (b) KDE (Eq. (4)) and (c) RKDE after one iteration of Eq. (25) with Huber loss (Eq. (24)), (d) KDE with median-of-means principle (Eq. (10)), where (a) is the true density function. We draw 1000 samples (gray circles) from a multivariate normal density and 100 outliers (red cross) from a gamma distribution as the contaminating density. RKDE and KDE with the median-of-means principle can be less affected by contaminated samples when computing self-attention as nonparametric regression.
